# Supplementary material for: Repeat Self-Harm Following Hospital-Presenting Intentional Drug Overdose among Young People—A National Registry Study
Source: MDPI journal article supplement (doi:10.3390/ijerph17176159), 2020-08-25
Supplement: s1 [file s1]

**Table S1.** Self-harm method at index episode and risk of repetition within 12 months.

| Method                    | All Individuals<br>N = 26,085 | Individuals Repeating<br>N = 4383, n (%) | Univariate Model |          | Multivariate Model |          |
|---------------------------|-------------------------------|------------------------------------------|------------------|----------|--------------------|----------|
|                           |                               |                                          | HR (95% CI)      | <i>p</i> | HR (95% CI)        | <i>p</i> |
| IDO only                  | 14,691                        | 1789 (12.2)                              | 0.84 (0.75–0.94) | 0.002    | 0.85 (0.76–0.96)   | 0.007    |
| Self-cutting only         | 5584                          | 901 (16.1)                               | 1.16 (1.03–1.31) | 0.018    | 1.16 (1.02–1.31)   | 0.020    |
| IDO and self-cutting      | 1464                          | 240 (16.4)                               | 1.18 (1.00–1.38) | 0.052    | 1.19 (1.01–1.40)   | 0.037    |
| Attempted hanging only    | 1360                          | 163 (12.0)                               | 0.83 (0.69–1.00) | 0.052    | 0.82 (0.68–0.98)   | 0.034    |
| Attempted drowning only   | 412                           | 49 (11.9)                                | 0.82 (0.61–1.10) | 0.187    | 0.85 (0.63–1.15)   | 0.299    |
| Other method <sup>a</sup> | 2574                          | 363 (14.1)                               | 1.00             | -        | 1.00               | -        |

<sup>a</sup> Other method presentations include those with other known methods and those for which method is unknown.
